# Supplementary material for: Anaerobic peroxisomes in Entamoeba histolytica metabolize myo-inositol
Source: PubMed Central journal article supplement (PMC8629394; doi:10.1371/journal.ppat.1010041), 2021-11-15
Supplement: ppat.1010041.s002.pdf [file ppat.1010041.s002.pdf]

Fig S2. Histograms from ImarisColoc analysis corresponding to images in Fig 5, 6, and 10

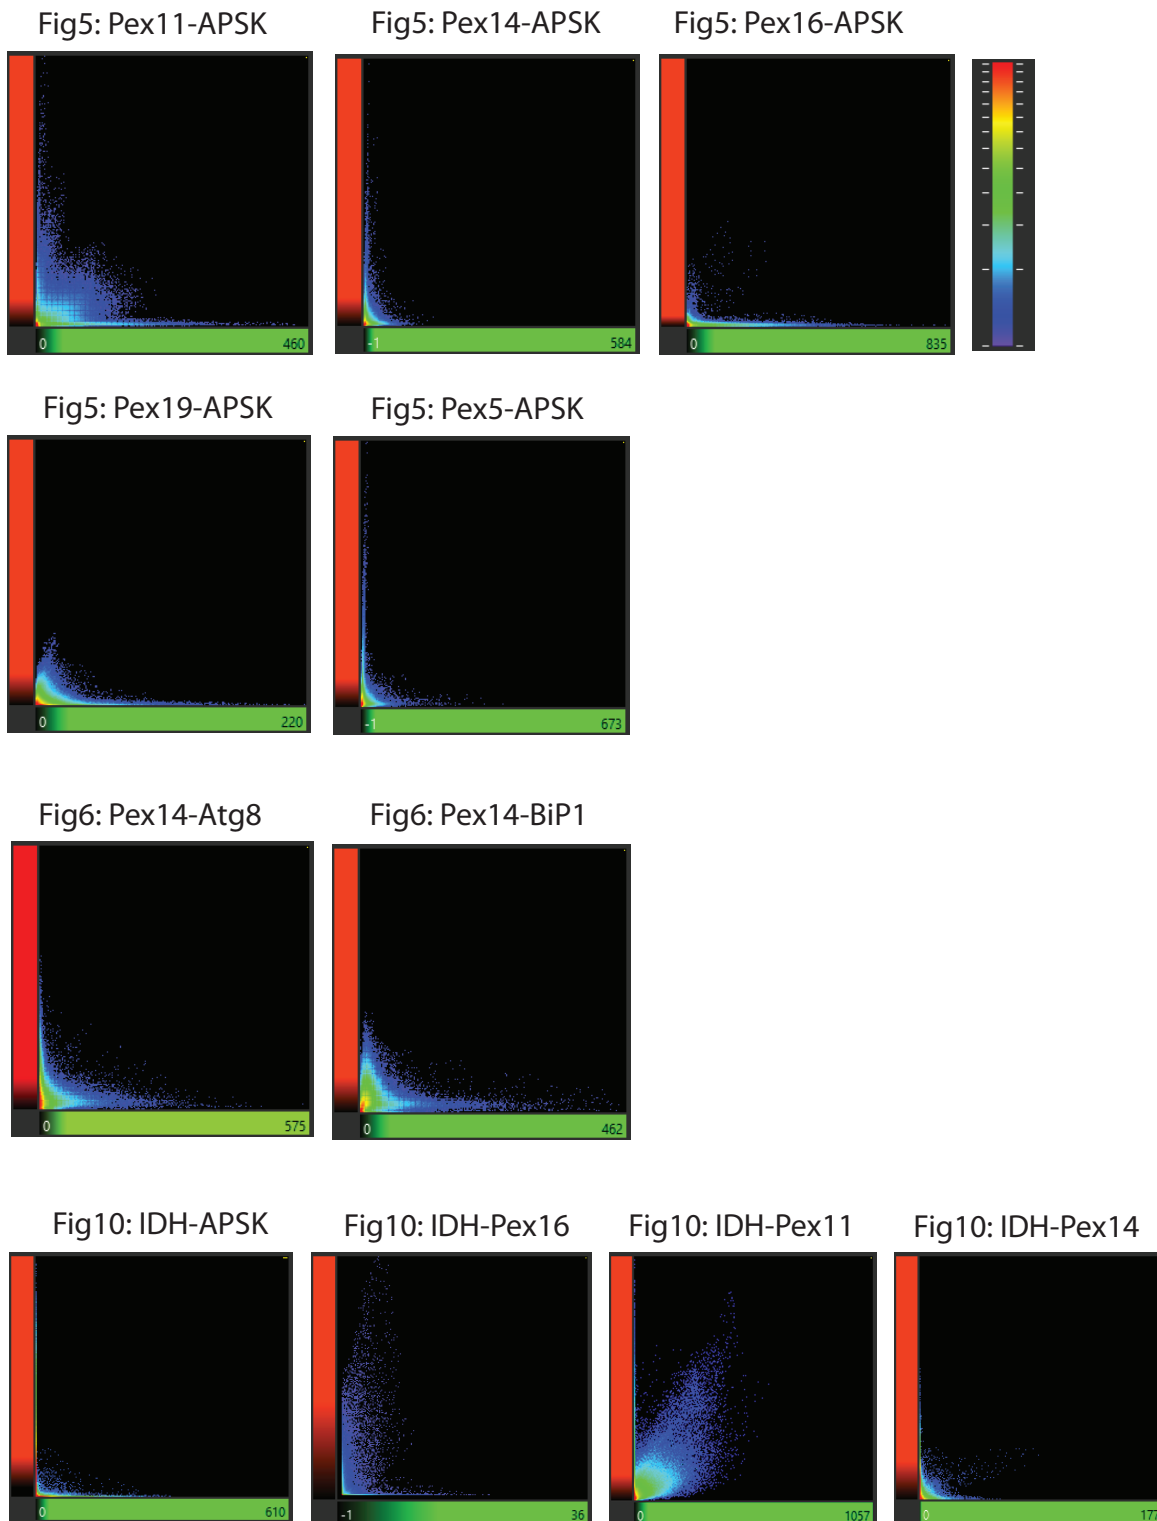

2D histograms from colocalization analysis for Fig 5, 6, and 10 using ImarisColoc in Imaris package. The frequency plot is shown on a logarithmic scale (the high frequencies are shown in red-to-yellow, low frequencies are shown in blue-to-violet). The number indicates border bins. Corresponding Pearson correlation coefficients are given in Table S5.
