# Supplementary material for: Anaerobic peroxisomes in Entamoeba histolytica metabolize myo-inositol
Source: PubMed Central journal article supplement (PMC8629394; doi:10.1371/journal.ppat.1010041), 2021-11-15
Supplement: ppat.1010041.s004.pdf [file ppat.1010041.s004.pdf]

Figure S4. Purification of recombinant His-tagged *myo*-IDH using Ni-NTA column under native condition and western blot analysis of *E. histolytica* cellular fractions using polyclonal antibodies raised against purified *myo*-IDH

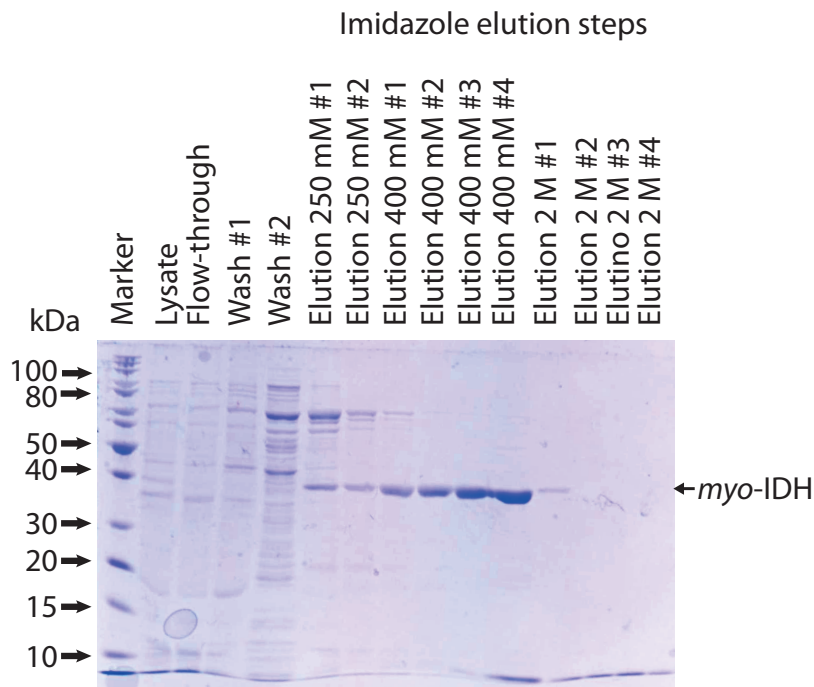

Identity of eluted IDH was confirmed by mass spectrometry and the purified IDH used for enzymology and the native molecular mass determination.

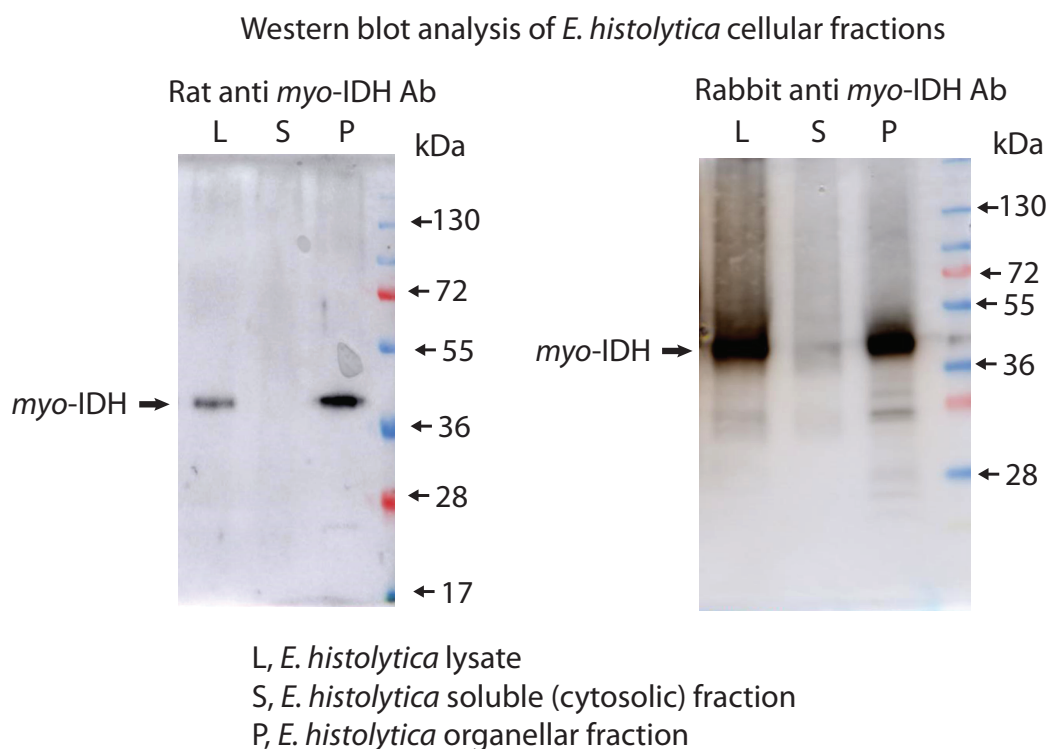

Rabbit and rat polyclonal antibodies were raised against *myo*-IDH purified under denaturing conditions.
