# Supplementary material for: Anaerobic peroxisomes in Entamoeba histolytica metabolize myo-inositol
Source: PubMed Central journal article supplement (PMC8629394; doi:10.1371/journal.ppat.1010041), 2021-11-15
Supplement: ppat.1010041.s006.pdf [file ppat.1010041.s006.pdf]

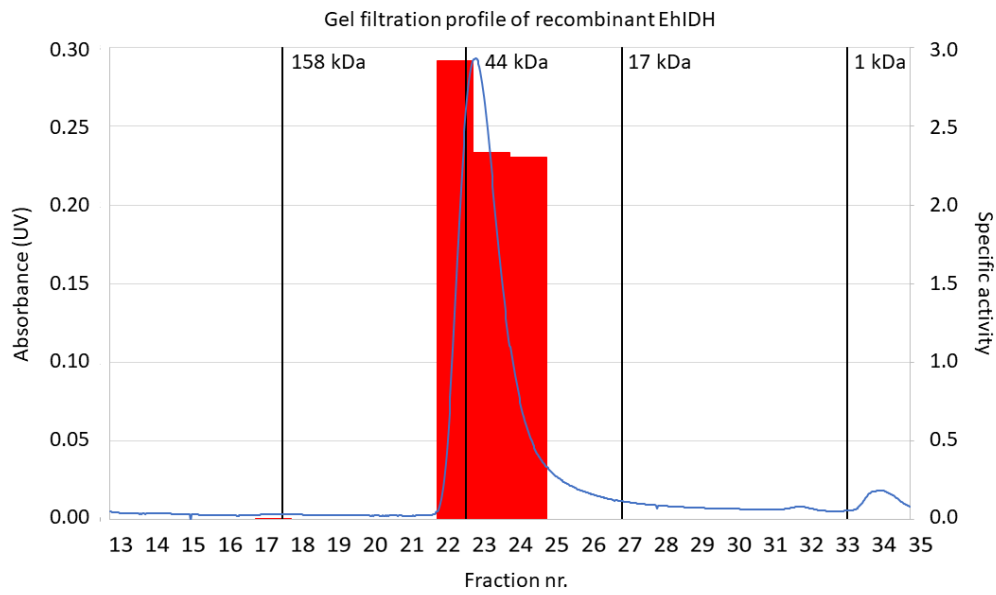

**Figure S6.** Native molecular mass of recombinant, His-tagged *myo*-inositol dehydrogenase estimated by size-exclusion chromatography on Superdex 200 Increase 10/300 GL column. Positions of standards in the elution profile are marked by black lines. Peak of active enzyme was recovered at the elution volume corresponding to 41 kDa. Specific *myo*-IDH activity is indicated by red columns.
