# Supplementary material for: Anaerobic peroxisomes in Entamoeba histolytica metabolize myo-inositol
Source: PLOS journal article supplement (doi:10.1371/journal.ppat.1010041), 2021-11-15

Figure S7. MALS analysis of *myo*-IDH. The protein sample showing the molar mass (axis on the left) along with elution profile (axis not shown) at free different concentrations, 2.0 mg/ml (red), 1.0 mg/ml (magenta) and 0.5 mg/ml (green).

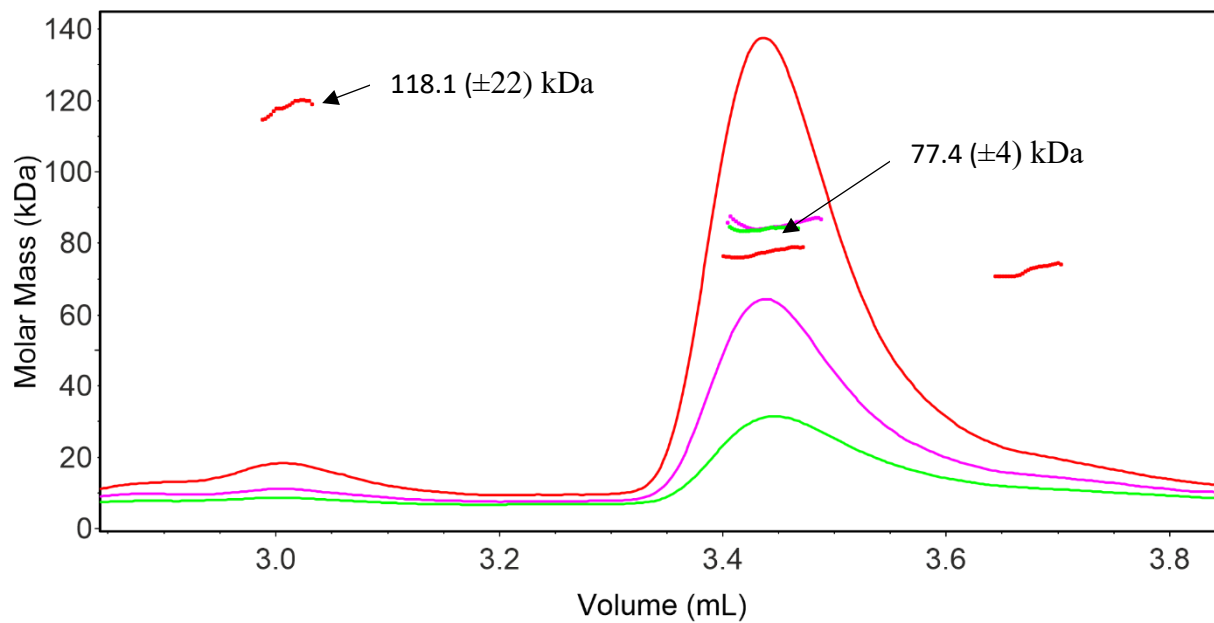

Supplement: S7 (10.1371/journal.ppat.1010041.s007) [file journal.ppat.1010041.s007]
